# Supplementary material for: A novel serum glucocorticoid regulated kinase 1 inhibitor improves cardiac structure and function in heart failure
Source: Research Square preprint supplement (doi:10.21203/rs.3.rs-7539711/v1), 2025-11-10
Supplement: Supplementary file 1 [file da310bc87d4b9f5d741b0972.xlsx]

## Sheet: Cardiomyocytes
Study	Disease	FDR SGK1	Hallmarks Upregulated	Hallmarks Downregulated
Chaffin	DCM	0.5	E2F (0.07), G2M (0.10)	Oxphos, Fatty, Adipo, IFNa+g, TNFa, EMT, inflamm., IL2+6
	HCM	0.048	EMT, IFNa+g, IL2, TNFa, inflamm.	Adipo (0.06), Oxphos (0.05), Fatty (0.10)
Amrute	AMI	0.07	EMT, IFNa+g, inflamm. TNFa, IL2+6, TGFb	Oxphos, Fatty, adipo
	ICM	1	None	Adipo (0.12)
	NICM	0.71	None	Adipo (0.08), Fatty (0.09), Oxphos (0.06), TNFa (0.07), IFNa (0.08), Inflamm. (0.09)
Koenig	DCM	0.47	None	Oxphos, Adipo, Fatty, IFNa+g, TNFa
Hulsmans	AF	No cardiomyocyte identified
Hill	AF	1	None	EMT, TGFb, Adipo, IL6, IFNa, inflamm. (0.07), TNFa (0.08)
Linna	IHD	1	None	Oxphos, EMT, Adipo, IFNa+g, TNFa, Fatty, IL2
	IHF	1	IFNa, IFNg, IL6, Inflamm. (0.08)	Oxphos, Adipo, Fatty(0.06)
	NIHF	1	None	Oxphos, EMT Fatty (0.07), Adipo (0.08)
	AMI	1	None	Oxphos, IFNa+g, Adipo, Fatty, TNFa, IL2, EMT
	RMI	1	None	Oxphos, IFNa+g,TNFa, Adipo, EMT, Fatty, IL2, IL6 (0.06)
	SAD	1	None	Oxphos, Adipo, Fatty
Reichart	ARVC	0.98	None	Oxphos, EMT, Inflammatory, TNFa, IL6
	DCM	0.86	TGFb, IL2	Oxphos, Fatty acid, Adipo (0.10)
Simonson	ICM	0.19	EMT, IL2+6, IFNa+g, TGFb, TNFa, Inflamm.	Oxphos, Adipo (0.06), Fatty acid (0.08)
The following hallmark (MH) signatures were analyzed: adipogenesis (Adipo), epithelial mesenchymal transition (EMT), fatty acid metabolism (Fatty), IL2 STAT5 signaling (IL2), IL6 JAK STAT3 signaling (IL6), Inflammatory response (inflamm), Interferon alpha response (IFNa), Interfereon gamma response (IFNg), Oxidative phosphorylation (Oxphos), TGF beta singlaing (TGFb), TNFA signaling via NFKB (TNF…
Refer to Table 1 for disease abbreviations

## Sheet: Endothelial
Study	Disease	FDR SGK1	Hallmarks Upregulated	Hallmarks Downregulated
Chaffin	HCM1	0.65	IFNa+g, EMT, TNFa	None
	DCM1	0.003	IFNa+g	Oxphos
Amrute	AMI	0.84	TNFa, Inflamm, EMT	Oxphos, Fatty, Adipo
	ICM	1	IFNa+g	Oxphos, Fatty (0.06), Adipo (0.08)
	NICM	0.9	EMT (0.05)	Oxphos, IL6 (0.05)
Koenig	DCM	0.75	None	Oxphos, Fatty, Adipo, IL6 (0.08)
Hulsmans	AF	1	Inflamm, TNFa, IFNa+g, IL2, IL6 (0.08)	None
Hill	AF2	1	None	EMT
Linna	AMI3	1	None	Oxphos, EMT, Adipo, Fatty, TNFa, IFNa+g, IL2+6
	IHD3	1	None	Oxphos, Adipo, EMT, Fatty, IFNa, IFNg (0.10)
	IHF3	1	IFNa+g, IL6	Oxphos
	NIHF3	1	None	Oxphos, Fatty
	RMI3	1	None	Oxphos, Adipo, Fatty, EMT, IFNa (0.05), IL2 (0.07), IFNg (0.08)
	SAD3	1	TNFa, Inflamm, TGFb, IL2+6 (0.07)	Oxphos, Fatty, Adipo
	AMI4	0.15	None	Oxphos, EMT, IFNa+g, TNFa, Adipo, Fatty, Inflamm, IL2, TGFb
	IHD4	1	None	Oxphos, EMT, Fatty, IFNa+g, Adipo, IL6 (0.09)
	IHF4	1	None	Oxphos, Adipo, Fatty, TNFa, EMT
	NIHF4	1	None	Oxphos, Fatty, Adipo, IFNa+g, IL6 (0.10)
	RMI4	0.17	None	Oxphos, Fatty, Adipo, EMT, TNFa, IFNa+g, Inflamm, IL2,
	SAD4	1	None	Oxphos, Fatty, Adipo, IFNa, EMT
Reichart	ARVC	0.59	TGFb, TNFa	Oxphos, EMT, Adipo, IFNa (0.06), Fatty (0.10)
	DCM	0.38	TGFb	Oxphos, EMT, Adipo, IFNa+g, Fatty, IL6 (0.07), Inflamm (0.08), TNFa (0.08)
Simonson	ICM1	0.54	Oxphos, TNFa, EMT, Adipo, Fatty, IFNg, IL2, Inflamm, TGFb (0.06), IFNa (0.06)	None
1Endothelial I 2Cardiac endothelial cell 3Endocardial endothelial cells 4Vascular endothelial cells
The following hallmark (MH) signatures were analyzed: adipogenesis (Adipo), epithelial mesenchymal transition (EMT), fatty acid metabolism (Fatty), IL2 STAT5 signaling (IL2), IL6 JAK STAT3 signaling (IL6), Inflammatory response (inflamm), Interferon alpha response (IFNa), Interfereon gamma response (IFNg), Oxidative phosphorylation (Oxphos), TGF beta singlaing (TGFb), TNFA signaling via NFKB (TNF…
Refer to Table 1 for disease abbreviations

## Sheet: Fibroblasts
Study	Disease	FDR SGK1	Hallmarks Upregulated	Hallmarks Downregulated
Chaffin	HCM1	0.34 á	IFNa+g	Adipo, OxPhos, Fatty, IL6 (0.06)
	DCM1	0.12 â	None	Oxphos, TNFa, Adipo, IL2+6, Fatty, TGFb, Inflamm
Amrute	AMI	0.05 á	IFNa+g, IL2+6, Inflamm, TNFa, TGFb, EMT	Oxphos, Adipo, Fatty
	ICM	0.88 á	IFNa (0.07), IFNg (0.11)	Oxphos, Adipo (0.07), Fatty (0.06)
	NICM	0.50 á	None	Oxphos, Fatty, TNFa, Inflamm (0.05), Adipo (0.05)
Koenig	DCM	0.36 â	EMT, TGFb,	Oxphos, Adipo, Fatty, IL6, TNFa
Hulsmans	AF	1	TNFa, EMT,IFNa+g, Inflamm, TGFb, IL2+6,	Oxphos
Hill	AF	No fibroblast subtype described
Linna	AMI	0.99	None	Oxphos, EMT, IFNa+g, Fatty, Adipo, TNFa, IL2, TGFb
	IHD	1	None	Oxphos, Adipo, Fatty, EMT, IFNg, IFNa (0.07)
	IHF	1	IFNa+g, IL6, Inflamm (0.06)	Oxphos, Fatty (0.07), Adipo (0.06)
	NIHF	1	TNFa, IL6 (0.11)	Oxphos, Fatty (0.07), Adipo (0.07)
	RMI	0.7	None	Oxphos, Adipo, Fatty, EMT, IFNa+g, IL2, TNFa, TGFb
	SAD	1	None	Oxphos, Adipo, Fatty, EMT, IFNa
Reichart	ARVC	0.04 â	None	Oxphos, Adipo, EMT, TNFa, IL6, Inflamm, Fatty (0.10)
	DCM	8.42E-07 â	None	Oxphos, TNFa, IL6, Fatty, Inflamm, IFNg (0.10)
Simonson	ICM	0.009 á	IFNa+g, Oxphos, IL2 (0.10)	IL-6
1Fibroblast I
The following hallmark (MH) signatures were analyzed: adipogenesis (Adipo), epithelial mesenchymal transition (EMT), fatty acid metabolism (Fatty), IL2 STAT5 signaling (IL2), IL6 JAK STAT3 signaling (IL6), Inflammatory response (inflamm), Interferon alpha response (IFNa), Interfereon gamma response (IFNg), Oxidative phosphorylation (Oxphos), TGF beta singlaing (TGFb), TNFA signaling via NFKB (TNF…
Refer to Table 1 for disease abbreviations

## Sheet: Macrophages
Study	Disease	FDR SGK1	Hallmarks Upregulated	Hallmarks Downregulated
Chaffin	HCM	5.69e-17	IFNa+g, TNFa (0.08)	Oxphos, Adipo, Fatty, EMT, IL2, IL6 (0.06)
	DCM	3.16e-13	IFNa+g	Oxphos, EMT, TGFb, IL2+6, Adipo, Fatty, Inflamm, TNFa
Amrute	AMI1	0.27	TNFa, EMT, IL2, TGFb, Inflamm, IFNg, IL6 (0.12)	Oxphos, Fatty (0.12)
	ICM1	1	IFNa+g, TNFa (0.09), IL2 (0.09)	None
	NICM1	0.75	EMT, TNFa (0.07), IL2 (0.09)	None
Koenig	DCM	3.81e-13	TNFa, IFNa, TGFb, IFNg (0.06)	Oxphos, Adipo, Fatty, IL6 (0.12)
Hulsmans	AF2	0.23	IL2+6, IFNa+g, Inflamm, TNFa	EMT
Hill	AF	0.98	None	EMT
Linna	AMI	1	None	Oxphos, Adipo, EMT, IFNa+g, Fatty, IL2
	IHD	1	None	Oxphos, Adipo
	IHF	1	IFNa (0.12), IFNg (0.14)	None
	NIHF	1	TNFa, Inflamm, IL6, IFNa+g,	Oxphos, Adipo
	RMI	1	None	Oxphos, EMT, Adipo, Fatty, IFNa
	SAD	1	TNFa (0.06)	Oxphos, Fatty (0.06), IFNa (0.07)
Reichart	ARVC1	0.009	None	Oxphos, EMT, Adipo, IL6, Fatty (0.07), IFNg (0.09)
	DCM1	0.09	None	Oxphos, EMT, Adipo, Inflamm, IL6 (0.07)
Simonson	ICM	0.04	EMT, TNFa, IFNa+g, IL2 (0.10), TGFb (0.12)	Inflamm, IL6
1Myeloid 2MPDC
The following hallmark (MH) signatures were analyzed: adipogenesis (Adipo), epithelial mesenchymal transition (EMT), fatty acid metabolism (Fatty), IL2 STAT5 signaling (IL2), IL6 JAK STAT3 signaling (IL6), Inflammatory response (inflamm), Interferon alpha response (IFNa), Interfereon gamma response (IFNg), Oxidative phosphorylation (Oxphos), TGF beta singlaing (TGFb), TNFA signaling via NFKB (TNF…
Refer to Table 1 for disease abbreviations

## Sheet: Pericytes
Study	Disease	FDR SGK1	Hallmarks Upregulated	Hallmarks Downregulated
Chaffin	HCM	0.001	None	None
	DCM	0.002	None	Oxphos, TGFb, TNFa. IL6 (0.07)
Amrute	AMI	0.15	TGFb, TNFa, EMT	Oxphos, Adipo, Fatty
	ICM	1	None	Oxphos
	NICM	1	None	Oxphos, Fatty (0.06), Adipo (0.07)
Koenig	DCM	0.003	None	Oxphos, Adipo, Fatty, TNFa, EMT, IL6
Hulsmans	AF*	1	Inflamm, IFNa+g, TNFa, IL6, IL2 (0.06)	None
Hill	AF	1	None	EMT, IFNg (0.07), IL2 (0.08)
Linna	AMI	1	None	Oxphos, IFNa+g, EMT, Fatty, Adipo, IL2, TNFa, TGFb, inflamm.
	IHD	1	None	Oxphos, Adipo, EMT
	IHF	1	None	Adipo, Oxphos, TNFa (0.09), TGFb (0.08)
	NIHF	1	None	Oxphos, Adipo
	RMI	0.39	None	Oxphos, Adipo, EMT, Fatty, IFNa+g, IL2, TGFb, TNFa, Inflamm (0.06)
	SAD	1	None	Oxphhos, IFNa+g, Fatty, EMT, Adipo, IL2
Reichart	ARVC*	0.99	TGFb	Oxphos, EMT, Adipo
	DCM*	0.005	TGFb	Oxphos, Adipo, EMT, Fatty
Simonson	ICM	1.92e-09	Oxphos, EMT, TNFa, Fatty, IFNa+g, Adipo, IL2, TGFb	None
*Mural cells (VSMC + pericytes)
The following hallmark (MH) signatures were analyzed: adipogenesis (Adipo), epithelial mesenchymal transition (EMT), fatty acid metabolism (Fatty), IL2 STAT5 signaling (IL2), IL6 JAK STAT3 signaling (IL6), Inflammatory response (inflamm), Interferon alpha response (IFNa), Interfereon gamma response (IFNg), Oxidative phosphorylation (Oxphos), TGF beta singlaing (TGFb), TNFA signaling via NFKB (TNF…
Refer to Table 1 for disease abbreviations

## Sheet: VSMCs
Study	Disease	FDR SGK1	Hallmarks Upregulated	Hallmarks Downregulated
Chaffin	HCM	0.04	None	Oxphos, TNFa, Adipo, IL2+6, Inflamm.,EMT, TGFb, Fatty (0.09)
	DCM	7.53e-06	None	TNFa, Oxphos, Adipo, IL2+6, EMT, |nflamm, TGFb, IFNg
Amrute	AMI	1	None	None
	ICM	1	None	None
	NICM	1	None	None
Koenig	DCM	0.66	None	Oxphos, Adipo, EMT, Fatty, TNFa, IL6, Inflamm
Hulsmans	AF*	1	Inflamm, IFNa+g, TNFa, IL6, IL2 (0.06)	None
Hill	AF	1	None	None
Linna	AMI	1	None	Oxphos, IFNa+g, EMT, Adipo, TNFa, Fatty, TGFb
	IHD	1	None	None
	IHF	1	None	None
	NIHF	1	None	None
	RMI	1	None	Oxphos, Adipo, Fatty, IFNg, EMT, TNFa (0.08)
	SAD	1	None	Oxphos, IFNa, EMT (0.06), IFNg (0.05)
Reichart	ARVC*	0.99	TGFb	Oxphos, EMT, Adipo
	DCM*	0.005	TGFb	Oxphos, Adipo, EMT, Fatty
Simonson	ICM	0.04	Oxphos, Fatty, EMT, Adipo, TNFa, IFNa (0.10), IL2 (0.10)	IL6 (0.06)
*Mural cells (VSMC + pericytes)
Rows highlighted in blue have significant overexpression of SGK1 mRNA in disease tissues compared to normal hearts.
The following hallmark (MH) signatures were analyzed: adipogenesis (Adipo), epithelial mesenchymal transition (EMT), fatty acid metabolism (Fatty), IL2 STAT5 signaling (IL2), IL6 JAK STAT3 signaling (IL6), Inflammatory response (inflamm), Interferon alpha response (IFNa), Interfereon gamma response (IFNg), Oxidative phosphorylation (Oxphos), TGF beta singlaing (TGFb), TNFA signaling via NFKB (TNF…
Refer to Table 1 for disease abbreviations
